# Supplementary material for: Aluminum dust exposure and risk of neurodegenerative diseases in a cohort of male miners in Ontario, Canada
Source: PubMed Central journal article supplement (PMC8504163; doi:10.5271/sjweh.3974), 2021-09-30
Supplement: SJWEH-47-531-S001.pdf [file SJWEH-47-531-S001.pdf]

**Supplemental Materials for manuscript titled, “Aluminum Dust Exposure and Risk of Neurodegenerative Diseases in a Cohort of Male Miners in Ontario, Canada”**

## Contents

|                                                                                                                                                                                             |    |
|---------------------------------------------------------------------------------------------------------------------------------------------------------------------------------------------|----|
| Figure S1. Flow diagram for selection of the study cohort.....                                                                                                                              | 2  |
| Figure S2. Timeline of Mining Master File, use of McIntyre Powder, and disease follow-up.....                                                                                               | 3  |
| Table S0. Case definitions and diagnostics codes used to ascertain Alzheimer's disease, Alzheimer's with other dementias, Parkinson's disease, parkinsonism, and motor neuron disease. .... | 4  |
| Section 1: Alzheimer's disease .....                                                                                                                                                        | 5  |
| S1.1 Risk of Alzheimer's disease for ever and cumulative exposure to MP comparing to those never exposed to MP by two assessment approaches. ....                                           | 6  |
| S1.2 Risk of Alzheimer's disease by time since last MP exposure, overall and by oretype, using two assessment approaches.....                                                               | 7  |
| S1.3 Risk for Alzheimer's disease for ever exposed to MP versus never for various exposure windows.....                                                                                     | 8  |
| Section 2: Alzheimer's and other dementias.....                                                                                                                                             | 9  |
| S2.1 Risk of Alzheimer's and other dementias for ever and cumulative exposure to MP comparing to those never exposed to MP by two assessment approaches. ....                               | 10 |
| S2.2 Risk of Alzheimer's and other dementias by time since last MP exposure, overall and by oretype, using two assessment approaches. ....                                                  | 11 |
| S2.3 Risk of Alzheimer's and other dementias for ever exposed to MP versus never for various exposure windows.....                                                                          | 12 |
| Section 3: Parkinsonism.....                                                                                                                                                                | 13 |
| S3.1 Risk of parkinsonism for ever and cumulative exposure to MP comparing to those never exposed to MP by two assessment approaches. ....                                                  | 14 |
| S3.2 Risk of parkinsonism by time since last MP exposure, overall and by oretype, using two assessment approaches. ....                                                                     | 15 |
| S3.3 Risk of parkinsonism for ever exposed to MP versus never for various exposure windows.....                                                                                             | 16 |
| Section 4: Parkinson's disease .....                                                                                                                                                        | 17 |
| S4.1 Risk of Parkinson's disease for ever and cumulative exposure to MP comparing to those never exposed to MP by two assessment approaches. ....                                           | 18 |
| S4.2 Risk of Parkinson's disease by time since last MP exposure, overall and by oretype, using two assessment approaches.....                                                               | 19 |
| S4.3 Risk of Parkinson's disease for ever exposed to MP versus never for various exposure windows. ....                                                                                     | 20 |

|                                                                                                                                                                          |    |
|--------------------------------------------------------------------------------------------------------------------------------------------------------------------------|----|
| S4.4 Risk of Parkinsonism and Other Parkinsonism but not Parkinson’s disease for miners with and without exposure to MP, using self-reports and historical records ..... | 21 |
| Section 5: Motor neuron disease .....                                                                                                                                    | 22 |
| S5.1 Risk of motor neuron disease for ever and cumulative exposure to MP comparing to those never exposed to MP by two assessment approaches.....                        | 23 |
| S5.3 Risk of motor neuron disease by time since last MP exposure, overall and by oretype, using two assessment approaches.....                                           | 24 |
| S5.3 Risk for motor neuron disease for ever exposed to MP versus never for various exposure windows.....                                                                 | 25 |



**Figure S1. Flow diagram for selection of the study cohort.**

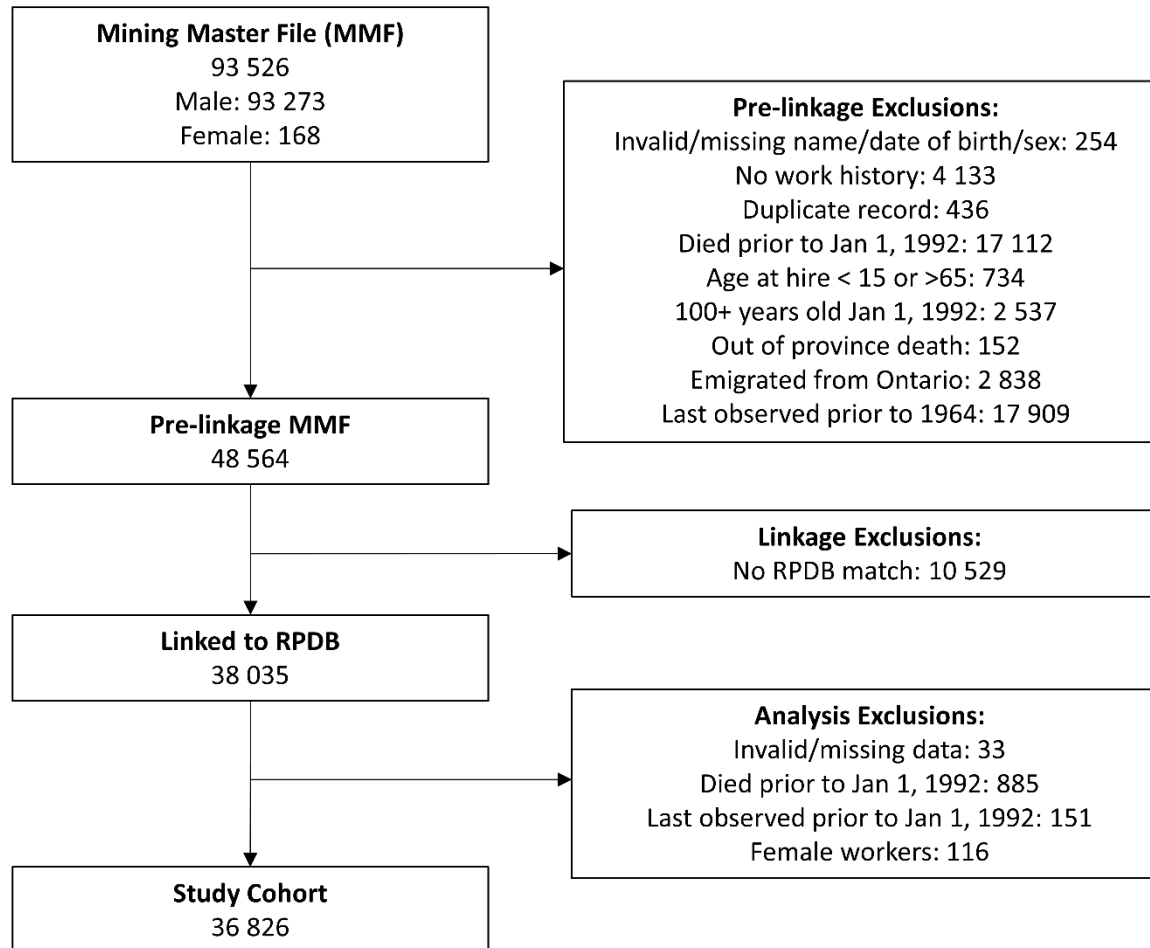

Note: Some records met multiple exclusion criteria; RPDB: Ontario's Registered Persons Database.

**Figure S2. Timeline of Mining Master File, use of McIntyre Powder, and disease follow-up.**

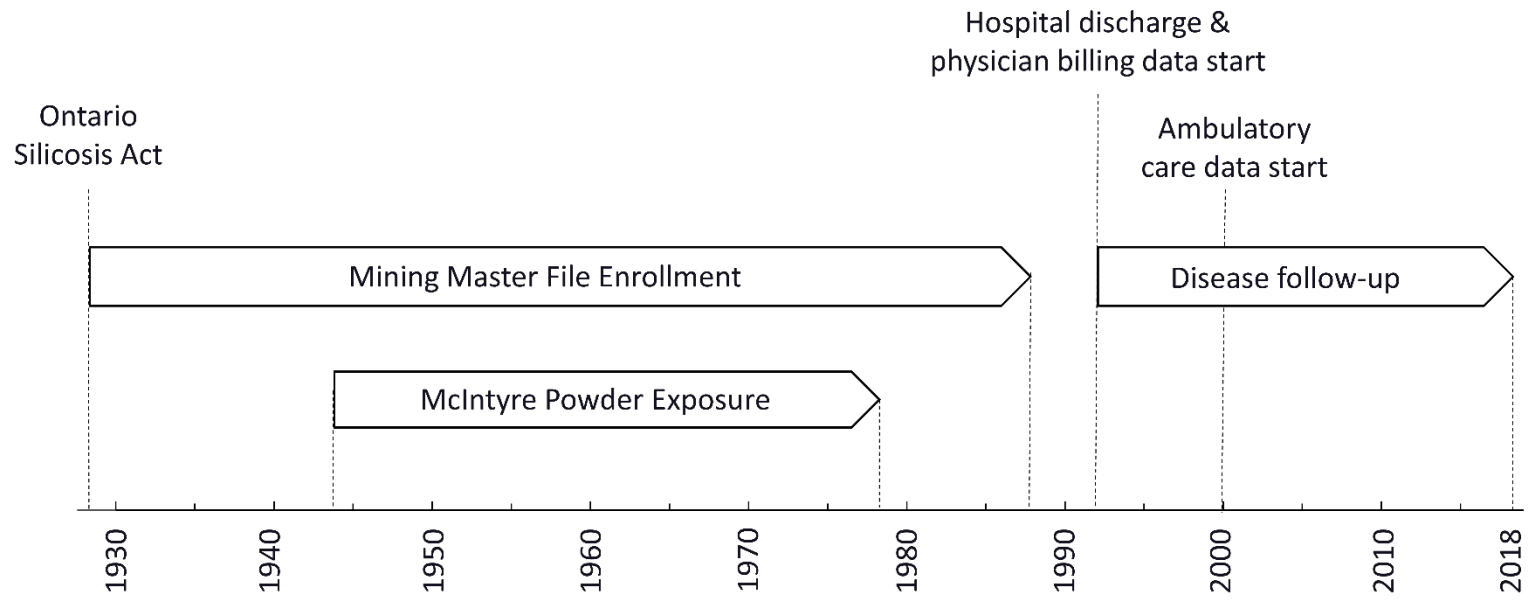

**Table S0. Case definitions and diagnostics codes used to ascertain Alzheimer's disease, Alzheimer's with other dementias, Parkinson's disease, parkinsonism, and motor neuron disease.**

| Neurodegenerative Conditions     | DAD/NACRS codes                  |                                          | OHIP codes | Case Definition                                                                                                                                                                         | Records in DAD | Records in NACRS | Records in OHIP      |
|----------------------------------|----------------------------------|------------------------------------------|------------|-----------------------------------------------------------------------------------------------------------------------------------------------------------------------------------------|----------------|------------------|----------------------|
|                                  | ICD-9 (1992-2002)                | ICD-10 (2002 onwards)                    |            |                                                                                                                                                                                         |                |                  |                      |
| Alzheimer's disease              | 331.0                            | G30                                      | –          | At least one record with corresponding diagnostic codes from hospital discharge or ambulatory care data                                                                                 | ≥ 1            | ≥ 1              | –                    |
| Alzheimer's with other dementias | 290, 294.1, 331.0, 331.1, 331.82 | F00, F01, F02, F03, G30                  | 290, 331   | At least one record with corresponding diagnostic codes from hospital discharge or ambulatory care data or at least two physician claims with diagnostic codes in OHIP within 12 months | ≥ 1            | ≥ 1              | ≥ 2 within 12 months |
| Parkinson's disease              | 332.0                            | G20                                      | –          | At least one record with corresponding diagnostic codes from hospital discharge or ambulatory care data                                                                                 | ≥ 1            | ≥ 1              | –                    |
| Parkinsonism                     | 332.0<br>332.1                   | G20,<br>G21.0-0.4, G21.8-9,<br>G22, F023 | 332        | At least one record with corresponding diagnostic codes from hospital discharge or ambulatory care data or at least two physician claims with diagnostic codes in OHIP within 12 months | ≥ 1            | ≥ 1              | ≥ 2 within 12 months |
| Motor neuron disease             | 335.2                            | G12.2                                    | –          | At least one record with corresponding diagnostic codes from hospital discharge or ambulatory care data                                                                                 | ≥ 1            | ≥ 1              | –                    |

ICD: International Classification of Diseases; DAD, Discharge Abstract Database; NACRS, National Ambulatory Care Reporting System; OHIP, Ontario Health Insurance Plan Claims Database; OHIP diagnostic code 290: dementia (senile, presenile); OHIP diagnostic code 331: other cerebral degenerations of central nervous system.

## **Section 1: Alzheimer's disease**



**S1.1 Risk of Alzheimer’s disease for ever and cumulative exposure to MP comparing to those never exposed to MP by two assessment approaches.**

| Exposure metrics                |                                         | N                        | Cases  | Cumulative person years | RR      | LCL  | UCL  |      |
|---------------------------------|-----------------------------------------|--------------------------|--------|-------------------------|---------|------|------|------|
| MP exposure                     | Self-reports                            | Never exposed to MP      | 27 278 | 589                     | 529 349 | 1.00 | —    | —    |
|                                 |                                         | Exposed to MP            | 9 548  | 278                     | 157 716 | 0.96 | 0.83 | 1.11 |
|                                 |                                         | Exposed only before 1956 | 853    | 44                      | 8 632   | 0.90 | 0.66 | 1.23 |
|                                 |                                         | Exposed ever after 1956  | 8 695  | 234                     | 149 084 | 0.97 | 0.83 | 1.13 |
|                                 |                                         | Exposed only after 1956  | 6 459  | 122                     | 123 399 | 0.91 | 0.75 | 1.11 |
|                                 | Historical Records                      | Never exposed to MP      | 22 999 | 554                     | 438 252 | 1.00 | —    | —    |
|                                 |                                         | Exposed to MP            | 13 827 | 313                     | 248 813 | 0.95 | 0.82 | 1.09 |
|                                 |                                         | Exposed only before 1956 | 966    | 54                      | 9 457   | 1.00 | 0.75 | 1.32 |
|                                 |                                         | Exposed ever after 1956  | 12 861 | 259                     | 239 356 | 0.94 | 0.81 | 1.09 |
|                                 |                                         | Exposed only after 1956  | 10 187 | 143                     | 207 044 | 0.93 | 0.77 | 1.13 |
| Cumulative MP exposure duration | Self-reports<br>(trend P = 0.469)       | Never exposed to MP      | 27 277 | 589                     | 529 349 | 1.00 | —    | —    |
|                                 |                                         | > 0 – 1 year             | 2 296  | 39                      | 42 017  | 0.70 | 0.51 | 0.97 |
|                                 |                                         | > 1 – 5 years            | 3 833  | 99                      | 68 117  | 0.97 | 0.79 | 1.21 |
|                                 |                                         | > 5 – 10 years           | 1 655  | 57                      | 25 690  | 1.04 | 0.80 | 1.37 |
|                                 |                                         | > 10 years               | 1 764  | 83                      | 21 892  | 1.06 | 0.84 | 1.34 |
|                                 | Historical Records<br>(trend P = 0.995) | Never exposed to MP      | 22 998 | 554                     | 438 252 | 1.00 | —    | —    |
|                                 |                                         | > 0 – 1 year             | 4 507  | 57                      | 91 939  | 0.95 | 0.72 | 1.24 |
|                                 |                                         | > 1 – 5 years            | 4 503  | 84                      | 85 811  | 0.89 | 0.71 | 1.12 |
|                                 |                                         | > 5 – 10 years           | 2 433  | 73                      | 39 491  | 0.96 | 0.75 | 1.22 |
|                                 |                                         | > 10 years               | 2 384  | 99                      | 31 572  | 1.00 | 0.80 | 1.23 |

Alzheimer’s disease: 1 code (ICD-9: 331.0; ICD-10: G30) in any diagnostic field in DAD/NACRS; DAD, Discharge Abstract Database; NACRS, National Ambulatory Care Reporting System. MP: McIntyre powder; Self-reports: self-reported MP exposure; Historical Records: estimated MP exposure; N: total number of miners in the analysis group; RR: Incidence rate ratio; LCL: Lower confidence limit; UCL: Upper confidence limit. The trend P value is calculated by fitting a linear line across median values (as continuous) of cumulative MP exposure duration categories in modelling risk of Alzheimer’s disease and dementia. All models adjusted by age, age<sup>2</sup>, and birth year. Age censored at 100 years old. Reference group: Mining industry workers never exposed to MP.

**S1.2 Risk of Alzheimer’s disease by time since last MP exposure, overall and by ore type, using two assessment approaches.**

| Parameter   | Time since last exposure | Self-reports |         |      |      |      | Historical Records |         |      |      |      |
|-------------|--------------------------|--------------|---------|------|------|------|--------------------|---------|------|------|------|
|             |                          | Cases        | Peryrs  | RR   | LCL  | UCL  | Cases              | Peryrs  | RR   | LCL  | UCL  |
| Full cohort | Never exposed to MP      | 589          | 529 349 | 1.00 | —    | —    | 554                | 438 252 | 1.00 | —    | —    |
|             | 12–19 years              | 6            | 21 076  | 0.53 | 0.24 | 1.19 | 6                  | 42 178  | 0.49 | 0.22 | 1.10 |
|             | 20–29 years              | 41           | 42 826  | 0.96 | 0.69 | 1.32 | 37                 | 74 092  | 0.80 | 0.57 | 1.11 |
|             | 30–39 years              | 77           | 54 008  | 0.99 | 0.78 | 1.26 | 90                 | 83 292  | 0.99 | 0.80 | 1.24 |
|             | 40–49 years              | 95           | 30 172  | 0.98 | 0.79 | 1.22 | 104                | 37 188  | 0.95 | 0.77 | 1.18 |
|             | 50–75 years              | 59           | 9 634   | 0.95 | 0.72 | 1.26 | 76                 | 12 062  | 1.05 | 0.82 | 1.34 |

Alzheimer’s disease: 1 code (ICD-9: 331.0; ICD-10: G30) in any diagnostic field in DAD/NACRS; DAD, Discharge Abstract Database; NACRS, National Ambulatory Care Reporting System. MP: McIntyre powder; Self-reports: self-reported MP exposure; Historical Records: estimated MP exposure; N: total number of miners in the analysis group; Peryrs: cumulative person years; RR: Incidence rate ratio; LCL: Lower confidence limit; UCL: Upper confidence limit. All models adjusted by age, age<sup>2</sup>, and birth year. Age censored at 100 years old. \*Workers in these groups were employed and exposed to MP only in gold and only in uranium mines; Reference group: Mining industry workers with no MP exposure within the same ore type.

**S1.3 Risk for Alzheimer’s disease for ever exposed to MP versus never for various exposure windows.**

| Exposure ‘window’ | Self-reports |        |              |         |      |      | Historical Records |            |         |              |         |      |      |      |
|-------------------|--------------|--------|--------------|---------|------|------|--------------------|------------|---------|--------------|---------|------|------|------|
|                   | MP Exposed   |        | MP-Unexposed |         | RR   | LCL  | UCL                | MP Exposed |         | MP-Unexposed |         | RR   | LCL  | UCL  |
|                   | cases        | Peryrs | cases        | Peryrs  |      |      |                    | cases      | Peryrs  | cases        | Peryrs  |      |      |      |
| 12–19 years ago   | 6            | 21 076 | 861          | 665 989 | 0.53 | 0.24 | 1.20               | 6          | 42 178  | 861          | 644 887 | 0.50 | 0.22 | 1.13 |
| 20–29 years ago   | 47           | 57 404 | 820          | 629 661 | 0.88 | 0.65 | 1.19               | 43         | 94 952  | 824          | 592 113 | 0.75 | 0.55 | 1.02 |
| 30–39 years ago   | 116          | 86 794 | 751          | 600 271 | 0.91 | 0.74 | 1.11               | 128        | 126 819 | 739          | 560 246 | 0.90 | 0.74 | 1.09 |
| 40–49 years ago   | 189          | 67 084 | 678          | 619 981 | 0.97 | 0.82 | 1.14               | 209        | 87 926  | 658          | 599 139 | 0.95 | 0.81 | 1.11 |
| 50–75 years ago   | 167          | 26 620 | 700          | 660 445 | 1.12 | 0.94 | 1.34               | 198        | 37 663  | 669          | 649 402 | 1.05 | 0.89 | 1.23 |

Alzheimer’s disease: 1 code (ICD-9: 331.0; ICD-10: G30) in any diagnostic field in DAD/NACRS; DAD, Discharge Abstract Database; NACRS, National Ambulatory Care Reporting System. MP: McIntyre powder; Self-reports: self-reported MP exposure; Historical Records: estimated MP exposure; N: total number of miners in the analysis group; Peryrs: cumulative person years; RR: Incidence rate ratio; LCL: Lower confidence limit; UCL: Upper confidence limit. All models adjusted by age, age<sup>2</sup>, and birth year. Age censored at 100 years old. Reference group: Mining industry workers with no MP exposure within the same exposure window;

This analysis used a rolling window of exposure and disease follow up. The risk of disease is compared among workers with and without MP exposure in various time windows prior to a given year throughout follow-up. This analysis assumes that those not exposed in each time window as the ‘non-exposed’. It also assumes no gaps between first and last exposure dates for all cohort members.

## **Section 2: Alzheimer's and other dementias**

**S2.1 Risk of Alzheimer’s and other dementias for ever and cumulative exposure to MP comparing to those never exposed to MP by two assessment approaches.**

| Exposure metrics                |                                         | N                        | Cases  | Cumulative person years | RR      | LCL  | UCL  |      |
|---------------------------------|-----------------------------------------|--------------------------|--------|-------------------------|---------|------|------|------|
| MP exposure                     | Self-reports                            | Never exposed to MP      | 27 273 | 3294                    | 519 834 | 1.00 | —    | —    |
|                                 |                                         | Exposed to MP            | 9 548  | 1721                    | 152 942 | 1.12 | 1.06 | 1.19 |
|                                 |                                         | Exposed only before 1956 | 862    | 260                     | 8 096   | 1.11 | 0.98 | 1.26 |
|                                 |                                         | Exposed ever after 1956  | 8 686  | 1461                    | 144 846 | 1.12 | 1.05 | 1.19 |
|                                 |                                         | Exposed only after 1956  | 6 459  | 854                     | 120 839 | 1.09 | 1.01 | 1.18 |
|                                 | Historical Records                      | Never exposed to MP      | 22 994 | 3004                    | 429 697 | 1.00 | —    | —    |
|                                 |                                         | Exposed to MP            | 13 827 | 2011                    | 243 079 | 1.14 | 1.08 | 1.21 |
|                                 |                                         | Exposed only before 1956 | 966    | 283                     | 8 862   | 1.11 | 0.98 | 1.26 |
|                                 |                                         | Exposed ever after 1956  | 12 861 | 1728                    | 234 216 | 1.15 | 1.08 | 1.22 |
|                                 |                                         | Exposed only after 1956  | 10 187 | 1028                    | 203 781 | 1.13 | 1.05 | 1.21 |
| Cumulative MP exposure duration | Self-reports<br>(trend P = 0.002)       | Never exposed to MP      | 27 273 | 3294                    | 519 834 | 1.00 | —    | —    |
|                                 |                                         | > 0 – 1 year             | 2 296  | 321                     | 41 070  | 1.03 | 0.92 | 1.15 |
|                                 |                                         | > 1 – 5 years            | 3 833  | 636                     | 66 461  | 1.14 | 1.05 | 1.24 |
|                                 |                                         | > 5 – 10 years           | 1 655  | 323                     | 24 705  | 1.13 | 1.01 | 1.27 |
|                                 |                                         | > 10 years               | 1 764  | 441                     | 20 705  | 1.15 | 1.04 | 1.27 |
|                                 | Historical Records<br>(trend P = 0.001) | Never exposed to MP      | 22 994 | 3004                    | 429 697 | 1.00 | —    | —    |
|                                 |                                         | > 0 – 1 year             | 4 507  | 417                     | 90 698  | 1.18 | 1.06 | 1.30 |
|                                 |                                         | > 1 – 5 years            | 4 503  | 591                     | 84 114  | 1.14 | 1.04 | 1.24 |
|                                 |                                         | > 5 – 10 years           | 2 433  | 428                     | 38 242  | 1.07 | 0.96 | 1.18 |
|                                 |                                         | > 10 years               | 2 384  | 575                     | 30 024  | 1.18 | 1.08 | 1.30 |

Alzheimer’s and other dementias: 1 code (ICD-9: 290, 294.1, 331.0, 331.1, 331.82; ICD-10: G30, F00, F01, F02, F03) in any diagnostic field in DAD/NACRS or 2 physician codes (OHIP code 290 and 331) within 12 months; DAD, Discharge Abstract Database; NACRS, National Ambulatory Care Reporting System; OHIP, Ontario Health Insurance Plan Claims Database. MP: McIntyre powder; Self-reports: self-reported MP exposure; Historical Records: estimated MP exposure; N: total number of miners in the analysis group; RR: Incidence rate ratio; LCL: Lower confidence limit; UCL: Upper confidence limit. The trend P value is calculated by fitting a linear line across median values (as continuous) of cumulative MP exposure duration categories in modelling risk of Alzheimer’s disease and dementia. All models adjusted by age, age<sup>2</sup>, and birth year. Age censored at 100 years old. Reference group: Mining industry workers never exposed to MP.

**S2.2 Risk of Alzheimer’s and other dementias by time since last MP exposure, overall and by ore type, using two assessment approaches.**

| Parameter   | Time since last exposure | Self-reports |         |      |      |      | Historical Records |         |      |      |      |
|-------------|--------------------------|--------------|---------|------|------|------|--------------------|---------|------|------|------|
|             |                          | Cases        | Peryrs  | RR   | LCL  | UCL  | Cases              | Peryrs  | RR   | LCL  | UCL  |
| Full cohort | Never exposed to MP      | 3 294        | 519 834 | 1.00 | —    | —    | 3 004              | 429 697 | 1.00 | —    | —    |
|             | 12–19 years              | 73           | 20 937  | 1.26 | 0.99 | 1.60 | 79                 | 42 019  | 1.22 | 0.97 | 1.53 |
|             | 20–29 years              | 266          | 42 161  | 1.20 | 1.06 | 1.37 | 298                | 73 318  | 1.21 | 1.07 | 1.36 |
|             | 30–39 years              | 500          | 52 620  | 1.17 | 1.07 | 1.29 | 600                | 81 568  | 1.17 | 1.07 | 1.28 |
|             | 40–49 years              | 551          | 28 619  | 1.11 | 1.02 | 1.22 | 631                | 35 398  | 1.14 | 1.04 | 1.24 |
|             | 50–75 years              | 331          | 8 605   | 0.99 | 0.88 | 1.11 | 403                | 10 776  | 1.05 | 0.95 | 1.17 |

Alzheimer’s and other dementias: 1 code (ICD-9: 290, 294.1, 331.0, 331.1, 331.82; ICD-10: G30, F00, F01, F02, F03) in any diagnostic field in DAD/NACRS or 2 physician codes (OHIP code 290 and 331) within 12 months; DAD, Discharge Abstract Database; NACRS, National Ambulatory Care Reporting System; OHIP, Ontario Health Insurance Plan Claims Database. MP: McIntyre powder; Self-reports: self-reported MP exposure; Historical Records: estimated MP exposure; N: total number of miners in the analysis group; Peryrs: cumulative person years; RR: Incidence rate ratio; LCL: Lower confidence limit; UCL: Upper confidence limit. All models adjusted by age, age<sup>2</sup>, and birth year. Age censored at 100 years old. \*Workers in these groups were employed and exposed to MP only in gold and only in uranium mines; Reference group: Mining industry workers with no MP exposure within the same ore type.

**S2.3 Risk of Alzheimer’s and other dementias for ever exposed to MP versus never for various exposure windows.**

| Exposure ‘window’ | Self-reports |        |              |        |      |      | Historical Records |            |         |              |         |      |      |      |
|-------------------|--------------|--------|--------------|--------|------|------|--------------------|------------|---------|--------------|---------|------|------|------|
|                   | MP Exposed   |        | MP-Unexposed |        | RR   | LCL  | UCL                | MP Exposed |         | MP-Unexposed |         | RR   | LCL  | UCL  |
|                   | cases        | Peryrs | cases        | Peryrs |      |      |                    | cases      | Peryrs  | cases        | Peryrs  |      |      |      |
| 12–19 years ago   | 73           | 20 937 | 4 942        | 651839 | 1.19 | 0.94 | 1.51               | 79         | 42 019  | 4 936        | 630 757 | 1.14 | 0.91 | 1.43 |
| 20–29 years ago   | 333          | 56 608 | 4 682        | 616168 | 1.16 | 1.03 | 1.30               | 366        | 94 041  | 4 649        | 578 735 | 1.15 | 1.03 | 1.28 |
| 30–39 years ago   | 803          | 84 713 | 4 212        | 588063 | 1.16 | 1.08 | 1.26               | 919        | 124 376 | 4 096        | 548 400 | 1.15 | 1.07 | 1.23 |
| 40–49 years ago   | 1 153        | 63 933 | 3 862        | 608843 | 1.15 | 1.08 | 1.23               | 1331       | 8 4325  | 3 684        | 588 451 | 1.17 | 1.09 | 1.24 |
| 50–75 years ago   | 844          | 24 052 | 4 171        | 648724 | 1.05 | 0.97 | 1.13               | 1056       | 34 403  | 3 959        | 638 373 | 1.05 | 0.98 | 1.13 |

Alzheimer’s and other dementias: 1 code (ICD-9: 290, 294.1, 331.0, 331.1, 331.82; ICD-10: G30, F00, F01, F02, F03) in any diagnostic field in DAD/NACRS or 2 physician codes (OHIP code 290 and 331) within 12 months; DAD, Discharge Abstract Database; NACRS, National Ambulatory Care Reporting System; OHIP, Ontario Health Insurance Plan Claims Database. MP: McIntyre powder; Self-reports: self-reported MP exposure; Historical Records: estimated MP exposure; N: total number of miners in the analysis group; Peryrs: cumulative person years; RR: Incidence rate ratio; LCL: Lower confidence limit; UCL: Upper confidence limit. All models adjusted by age, age<sup>2</sup>, and birth year. Age censored at 100 years old. Reference group: Mining industry workers with no MP exposure within the same exposure window;

This analysis used a rolling window of exposure and disease follow up. The risk of disease is compared among workers with and without MP exposure in various time windows prior to a given year throughout follow-up. This analysis assumes that those not exposed in each time window as the ‘non-exposed’. It also assumes no gaps between first and last exposure dates for all cohort members.

## **Section 3: Parkinsonism**



**S3.1 Risk of parkinsonism for ever and cumulative exposure to MP comparing to those never exposed to MP by two assessment approaches.**

| Exposure metrics                |                                         | N                        | Cases  | Cumulative person years | RR      | LCL  | UCL  |      |
|---------------------------------|-----------------------------------------|--------------------------|--------|-------------------------|---------|------|------|------|
| MP exposure                     | Self-reports                            | Never exposed to MP      | 27 274 | 667                     | 527 379 | 1.00 | —    | —    |
|                                 |                                         | Exposed to MP            | 9 547  | 364                     | 156 428 | 1.19 | 1.05 | 1.36 |
|                                 |                                         | Exposed only before 1956 | 852    | 45                      | 8 536   | 1.08 | 0.80 | 1.48 |
|                                 |                                         | Exposed ever after 1956  | 8 695  | 319                     | 147 892 | 1.21 | 1.06 | 1.38 |
|                                 |                                         | Exposed only after 1956  | 6 459  | 192                     | 122 565 | 1.16 | 0.99 | 1.37 |
|                                 | Historical Records                      | Never exposed to MP      | 22 995 | 605                     | 436 469 | 1.00 | —    | —    |
|                                 |                                         | Exposed to MP            | 13 826 | 426                     | 247 338 | 1.18 | 1.04 | 1.33 |
|                                 |                                         | Exposed only before 1956 | 965    | 57                      | 9 342   | 1.25 | 0.94 | 1.65 |
|                                 |                                         | Exposed ever after 1956  | 12 861 | 369                     | 237 996 | 1.17 | 1.02 | 1.33 |
|                                 |                                         | Exposed only after 1956  | 10 187 | 230                     | 206 087 | 1.14 | 0.98 | 1.33 |
| Cumulative MP exposure duration | Self-reports<br>(trend P = 0.030)       | Never exposed to MP      | 27 278 | 667                     | 527 379 | 1.00 | —    | —    |
|                                 |                                         | > 0 – 1 year             | 2 296  | 73                      | 41 706  | 1.17 | 0.92 | 1.49 |
|                                 |                                         | > 1 – 5 years            | 3 833  | 132                     | 67 566  | 1.18 | 0.98 | 1.42 |
|                                 |                                         | > 5 – 10 years           | 1 655  | 66                      | 25 513  | 1.15 | 0.89 | 1.48 |
|                                 |                                         | > 10 years               | 1 764  | 93                      | 21 643  | 1.27 | 1.02 | 1.58 |
|                                 | Historical Records<br>(trend P = 0.007) | Never exposed to MP      | 22 999 | 605                     | 436 469 | 1.00 | —    | —    |
|                                 |                                         | > 0 – 1 year             | 4 507  | 88                      | 91 714  | 1.12 | 0.90 | 1.41 |
|                                 |                                         | > 1 – 5 years            | 4 503  | 124                     | 85 217  | 1.15 | 0.95 | 1.40 |
|                                 |                                         | > 5 – 10 years           | 2 433  | 88                      | 39 206  | 1.09 | 0.87 | 1.36 |
|                                 |                                         | > 10 years               | 2 384  | 126                     | 31 201  | 1.32 | 1.09 | 1.61 |

Parkinsonism: 1 code (ICD-9: 332.0, 332.1; ICD-10: G20, G21.0-0.4, G21.8-9, G22, F023) in any diagnostic field in DAD/NACRS or 2 physician codes (OHIP code 332) within 12 months; DAD, Discharge Abstract Database; NACRS, National Ambulatory Care Reporting System; OHIP, Ontario Health Insurance Plan Claims Database. MP: McIntyre powder; Self-reports: self-reported MP exposure; Historical Records: estimated MP exposure; N: total number of miners in the analysis group; RR: Incidence rate ratio; LCL: Lower confidence limit; UCL: Upper confidence limit. The trend P value is calculated by fitting a linear line across median values (as continuous) of cumulative MP exposure duration categories in modelling risk of Alzheimer's disease and dementia. All models adjusted by age, age<sup>2</sup>, and birth year. Age censored at 100 years old. Reference group: Mining industry workers never exposed to MP.

**S3.2 Risk of parkinsonism by time since last MP exposure, overall and by ore type, using two assessment approaches.**

| Parameter   | Time since last exposure | Self-reports |         |      |      |      | Historical Records |         |      |      |      |
|-------------|--------------------------|--------------|---------|------|------|------|--------------------|---------|------|------|------|
|             |                          | Cases        | Peryrs  | RR   | LCL  | UCL  | Cases              | Peryrs  | RR   | LCL  | UCL  |
| Full cohort | Never exposed to MP      | 667          | 527 379 | 1.00 | —    | —    | 605                | 436 469 | 1.00 | —    | —    |
|             | 12–19 years              | 29           | 20 996  | 1.53 | 1.05 | 2.24 | 34                 | 42 083  | 1.51 | 1.06 | 2.15 |
|             | 20–29 years              | 73           | 42 597  | 1.31 | 1.02 | 1.67 | 80                 | 73 798  | 1.22 | 0.96 | 1.54 |
|             | 30–39 years              | 123          | 53 556  | 1.27 | 1.04 | 1.54 | 147                | 82 722  | 1.23 | 1.03 | 1.48 |
|             | 40–49 years              | 105          | 29 729  | 1.15 | 0.94 | 1.42 | 115                | 36 743  | 1.10 | 0.90 | 1.34 |
|             | 50–75 years              | 34           | 9 550   | 0.82 | 0.58 | 1.17 | 50                 | 11 992  | 1.01 | 0.75 | 1.36 |

Parkinsonism: 1 code (ICD-9: 332.0, 332.1; ICD-10: G20, G21.0-0.4, G21.8-9, G22, F023) in any diagnostic field in DAD/NACRS or 2 physician codes (OHIP code 332) within 12 months; DAD, Discharge Abstract Database; NACRS, National Ambulatory Care Reporting System; OHIP, Ontario Health Insurance Plan Claims Database. MP: McIntyre powder; Self-reports: self-reported MP exposure; Historical Records: estimated MP exposure; N: total number of miners in the analysis group; Peryrs: cumulative person years; RR: Incidence rate ratio; LCL: Lower confidence limit; UCL: Upper confidence limit. All models adjusted by age, age<sup>2</sup>, and birth year. Age censored at 100 years old. \*Workers in these groups were employed and exposed to MP only in gold and only in uranium mines; Reference group: Mining industry workers with no MP exposure within the same ore type.

### S3.3 Risk of parkinsonism for ever exposed to MP versus never for various exposure windows.

| Exposure 'window' | Self-reports |        |              |         |      |      | Historical Records |            |         |              |         |      |      |      |
|-------------------|--------------|--------|--------------|---------|------|------|--------------------|------------|---------|--------------|---------|------|------|------|
|                   | MP Exposed   |        | MP-Unexposed |         | RR   | LCL  | UCL                | MP Exposed |         | MP-Unexposed |         | RR   | LCL  | UCL  |
|                   | cases        | Peryrs | cases        | Peryrs  |      |      |                    | cases      | Peryrs  | cases        | Peryrs  |      |      |      |
| 12–19 years ago   | 29           | 20 996 | 1002         | 662 811 | 1.42 | 0.97 | 2.06               | 34         | 42 083  | 997          | 641 723 | 1.41 | 0.99 | 2.00 |
| 20–29 years ago   | 99           | 57 105 | 932          | 626 701 | 1.28 | 1.03 | 1.58               | 110        | 94 573  | 921          | 589 234 | 1.22 | 1.00 | 1.50 |
| 30–39 years ago   | 215          | 86 091 | 816          | 597 715 | 1.31 | 1.13 | 1.53               | 238        | 125 966 | 793          | 557 840 | 1.22 | 1.05 | 1.42 |
| 40–49 years ago   | 241          | 66 215 | 790          | 617 591 | 1.21 | 1.04 | 1.40               | 269        | 86 952  | 762          | 596 854 | 1.12 | 0.97 | 1.29 |
| 50–75 years ago   | 126          | 26 286 | 905          | 657 520 | 1.10 | 0.90 | 1.34               | 164        | 37 199  | 867          | 646 608 | 1.08 | 0.90 | 1.28 |

Parkinsonism: 1 code (ICD-9: 332.0, 332.1; ICD-10: G20, G21.0-0.4, G21.8-9, G22, F023) in any diagnostic field in DAD/NACRS or 2 physician codes (OHIP code 332) within 12 months; DAD, Discharge Abstract Database; NACRS, National Ambulatory Care Reporting System; OHIP, Ontario Health Insurance Plan Claims Database. MP: McIntyre powder; Self-reports: self-reported MP exposure; Historical Records: estimated MP exposure; N: total number of miners in the analysis group; Peryrs: cumulative person years; RR: Incidence rate ratio; LCL: Lower confidence limit; UCL: Upper confidence limit. All models adjusted by age, age<sup>2</sup>, and birth year. Age censored at 100 years old. Reference group: Mining industry workers with no MP exposure within the same exposure window;

This analysis used a rolling window of exposure and disease follow up. The risk of disease is compared among workers with and without MP exposure in various time windows prior to a given year throughout follow-up. This analysis assumes that those not exposed in each time window as the 'non-exposed'. It also assumes no gaps between first and last exposure dates for all cohort members.

## **Section 4: Parkinson's disease**

**S4.1 Risk of Parkinson’s disease for ever and cumulative exposure to MP comparing to those never exposed to MP by two assessment approaches.**

| Exposure metrics                |                                         | N                        | Cases  | Cumulative person years | RR      | LCL  | UCL  |      |
|---------------------------------|-----------------------------------------|--------------------------|--------|-------------------------|---------|------|------|------|
| MP exposure                     | Self-reports                            | Never exposed to MP      | 27 278 | 393                     | 529 698 | 1.00 | —    | —    |
|                                 |                                         | Exposed to MP            | 9 548  | 251                     | 157 671 | 1.34 | 1.14 | 1.57 |
|                                 |                                         | Exposed only before 1956 | 853    | 34                      | 8 634   | 1.18 | 0.83 | 1.69 |
|                                 |                                         | Exposed ever after 1956  | 8 695  | 217                     | 149 037 | 1.36 | 1.16 | 1.61 |
|                                 |                                         | Exposed only after 1956  | 6 459  | 125                     | 123 325 | 1.34 | 1.09 | 1.64 |
|                                 | Historical Records                      | Never exposed to MP      | 22 999 | 360                     | 438 584 | 1.00 | —    | —    |
|                                 |                                         | Exposed to MP            | 13 827 | 284                     | 248 785 | 1.32 | 1.13 | 1.54 |
|                                 |                                         | Exposed only before 1956 | 966    | 39                      | 9 499   | 1.22 | 0.87 | 1.71 |
|                                 |                                         | Exposed ever after 1956  | 12 861 | 245                     | 239 286 | 1.34 | 1.14 | 1.57 |
|                                 |                                         | Exposed only after 1956  | 10 187 | 143                     | 206 963 | 1.33 | 1.09 | 1.62 |
| Cumulative MP exposure duration | Self-reports<br>(trend P = 0.043)       | Never exposed to MP      | 27 274 | 393                     | 529 698 | 1.00 | —    | —    |
|                                 |                                         | > 0 – 1 year             | 2 296  | 50                      | 41 960  | 1.36 | 1.01 | 1.82 |
|                                 |                                         | > 1 – 5 years            | 3 833  | 90                      | 68 090  | 1.34 | 1.07 | 1.69 |
|                                 |                                         | > 5 – 10 years           | 1 654  | 48                      | 25 693  | 1.35 | 1.00 | 1.83 |
|                                 |                                         | > 10 years               | 1 764  | 63                      | 21 928  | 1.30 | 0.99 | 1.71 |
|                                 | Historical Records<br>(trend P = 0.003) | Never exposed to MP      | 22 995 | 360                     | 438 584 | 1.00 | —    | —    |
|                                 |                                         | > 0 – 1 year             | 4 507  | 52                      | 91 987  | 1.23 | 0.92 | 1.65 |
|                                 |                                         | > 1 – 5 years            | 4 503  | 80                      | 85 742  | 1.28 | 1.01 | 1.63 |
|                                 |                                         | > 5 – 10 years           | 2 432  | 65                      | 39 465  | 1.32 | 1.02 | 1.73 |
|                                 |                                         | > 10 years               | 2 384  | 87                      | 31 591  | 1.42 | 1.12 | 1.80 |

Parkinson’s disease: 1 code (ICD-9: 332.0; ICD-10: G20) in any diagnostic field in DAD/NACRS; DAD, Discharge Abstract Database; NACRS, National Ambulatory Care Reporting System. MP: McIntyre powder; Self-reports: self-reported MP exposure; Historical Records: estimated MP exposure; N: total number of miners in the analysis group; RR: Incidence rate ratio; LCL: Lower confidence limit; UCL: Upper confidence limit. The trend P value is calculated by fitting a linear line across median values (as continuous) of cumulative MP exposure duration categories in modelling risk of Alzheimer’s disease and dementia. All models adjusted by age, age<sup>2</sup>, and birth year. Age censored at 100 years old. Reference group: Mining industry workers never exposed to MP.

**S4.2 Risk of Parkinson’s disease by time since last MP exposure, overall and by oertype, using two assessment approaches.**

| Parameter   | Time since last exposure | Self-reports |         |      |      |      | Historical Records |         |      |      |      |
|-------------|--------------------------|--------------|---------|------|------|------|--------------------|---------|------|------|------|
|             |                          | Cases        | Peryrs  | RR   | LCL  | UCL  | Cases              | Peryrs  | RR   | LCL  | UCL  |
| Full cohort | Never exposed to MP      | 393          | 529 698 | 1.00 | —    | —    | 360                | 438 584 | 1.00 | —    | —    |
|             | 12–19 years              | 12           | 21 060  | 1.40 | 0.78 | 2.52 | 10                 | 42 165  | 1.05 | 0.55 | 1.99 |
|             | 20–29 years              | 41           | 42 830  | 1.39 | 1.00 | 1.93 | 45                 | 74 090  | 1.38 | 1.00 | 1.89 |
|             | 30–39 years              | 77           | 53 969  | 1.42 | 1.11 | 1.82 | 96                 | 83 220  | 1.50 | 1.20 | 1.88 |
|             | 40–49 years              | 86           | 30 109  | 1.42 | 1.12 | 1.79 | 87                 | 37 139  | 1.27 | 1.01 | 1.61 |
|             | 50–75 years              | 35           | 9 703   | 1.01 | 0.71 | 1.45 | 46                 | 12 171  | 1.14 | 0.83 | 1.56 |

Parkinson’s disease: 1 code (ICD-9: 332.0; ICD-10: G20) in any diagnostic field in DAD/NACRS; DAD, Discharge Abstract Database; NACRS, National Ambulatory Care Reporting System. MP: McIntyre powder; Self-reports: self-reported MP exposure; Historical Records: estimated MP exposure; N: total number of miners in the analysis group; Peryrs: cumulative person years; RR: Incidence rate ratio; LCL: Lower confidence limit; UCL: Upper confidence limit. All models adjusted by age, age<sup>2</sup>, and birth year. Age censored at 100 years old. \*Workers in these groups were employed and exposed to MP only in gold and only in uranium mines; Reference group: Mining industry workers with no MP exposure within the same ore type.

**S4.3 Risk of Parkinson’s disease for ever exposed to MP versus never for various exposure windows.**

| Exposure ‘window’ | Self-reports |        |              |         |      |      | Historical Records |            |         |              |         |      |      |      |
|-------------------|--------------|--------|--------------|---------|------|------|--------------------|------------|---------|--------------|---------|------|------|------|
|                   | MP Exposed   |        | MP-Unexposed |         | RR   | LCL  | UCL                | MP Exposed |         | MP-Unexposed |         | RR   | LCL  | UCL  |
|                   | cases        | Peryrs | cases        | Peryrs  |      |      |                    | cases      | Peryrs  | cases        | Peryrs  |      |      |      |
| 12–19 years ago   | 12           | 21 060 | 632          | 666 309 | 1.23 | 0.69 | 2.20               | 10         | 42 165  | 634          | 645 204 | 0.92 | 0.49 | 1.73 |
| 20–29 years ago   | 52           | 57 397 | 592          | 629 972 | 1.25 | 0.93 | 1.68               | 55         | 94 936  | 589          | 592 433 | 1.20 | 0.90 | 1.60 |
| 30–39 years ago   | 128          | 86 747 | 516          | 600 622 | 1.37 | 1.13 | 1.68               | 144        | 126 731 | 500          | 560 638 | 1.37 | 1.13 | 1.65 |
| 40–49 years ago   | 175          | 67 015 | 469          | 620 354 | 1.35 | 1.13 | 1.61               | 190        | 87 857  | 454          | 599 512 | 1.26 | 1.06 | 1.50 |
| 50–75 years ago   | 117          | 26 721 | 527          | 660 648 | 1.28 | 1.04 | 1.59               | 148        | 37 778  | 496          | 649 591 | 1.27 | 1.05 | 1.55 |

Parkinson’s disease: 1 code (ICD-9: 332.0; ICD-10: G20) in any diagnostic field in DAD/NACRS; DAD, Discharge Abstract Database; NACRS, National Ambulatory Care Reporting System. MP: McIntyre powder; Self-reports: self-reported MP exposure; Historical Records: estimated MP exposure; N: total number of miners in the analysis group; Peryrs: cumulative person years; RR: Incidence rate ratio; LCL: Lower confidence limit; UCL: Upper confidence limit. All models adjusted by age, age<sup>2</sup>, and birth year. Age censored at 100 years old. Reference group: Mining industry workers with no MP exposure within the same exposure window;

This analysis used a rolling window of exposure and disease follow up. The risk of disease is compared among workers with and without MP exposure in various time windows prior to a given year throughout follow-up. This analysis assumes that those not exposed in each time window as the ‘non-exposed’. It also assumes no gaps between first and last exposure dates for all cohort members.

**S4.4 Risk of Parkinsonism and Other Parkinsonism but not Parkinson’s disease for miners with and without exposure to MP, using self-reports and historical records.**

| Conditions                                               | Case definition                                                                                                                                        | MP exposure        |       | Cases | peryrs  | RR   | LCL  | UCL  |
|----------------------------------------------------------|--------------------------------------------------------------------------------------------------------------------------------------------------------|--------------------|-------|-------|---------|------|------|------|
| Parkinsonism                                             | 1 code (ICD-9 332.0, 332.1; ICD-10 G20, G21.0-0.4, G21.8-9, G22, F02.3) in any diagnostic field in DAD/NACRS                                           | Self-reports       | Ever  | 255   | 157 443 | 1.32 | 1.13 | 1.54 |
|                                                          |                                                                                                                                                        |                    | Never | 406   | 529 346 | 1.00 | —    | —    |
|                                                          |                                                                                                                                                        | Historical records | Ever  | 289   | 248 543 | 1.30 | 1.11 | 1.51 |
|                                                          |                                                                                                                                                        |                    | Never | 372   | 438 246 | 1.00 | —    | —    |
| Other parkinsonism but not Parkinson’s disease           | 1 code (ICD-9 332.1; ICD-10 G21.0-0.4, G21.8-9, G22, F02.3) in any diagnostic field in DAD/NACRS                                                       | Self-reports       | Ever  | 4     | 158 259 | 0.75 | 0.24 | 2.34 |
|                                                          |                                                                                                                                                        |                    | Never | 13    | 530 616 | 1.00 | —    | —    |
|                                                          |                                                                                                                                                        | Historical records | Ever  | 5     | 249 450 | 0.71 | 0.25 | 2.01 |
|                                                          |                                                                                                                                                        |                    | Never | 12    | 439 425 | 1.00 | —    | —    |
| Other parkinsonism but not confirmed Parkinson’s disease | 1 code (ICD-9 332.1; ICD-10 G21.0-0.4, G21.8-9, G22, F02.3) in any diagnostic field in DAD/NACRS or 2 physician codes (OHIP code 332) within 12 months | Self-reports       | Ever  | 360   | 156 449 | 1.20 | 1.06 | 1.37 |
|                                                          |                                                                                                                                                        |                    | Never | 421   | 527 432 | 1.00 | —    | —    |
|                                                          |                                                                                                                                                        | Historical records | Ever  | 593   | 247 363 | 1.19 | 1.05 | 1.34 |
|                                                          |                                                                                                                                                        |                    | Never | 421   | 436 518 | 1.00 | —    | —    |

DAD, Discharge Abstract Database; NACRS, National Ambulatory Care Reporting System; OHIP, Ontario Health Insurance Plan Claims Database. MP: McIntyre powder; Self-reports: self-reported MP exposure; Historical Records: estimated MP exposure; N: total number of miners in the analysis group; Peryrs: cumulative person years; RR: Incidence rate ratio; LCL: Lower confidence limit; UCL: Upper confidence limit. All models adjusted by age, age<sup>2</sup>, and birth year. Age censored at 100 years old.



## **Section 5: Motor neuron disease**

**S5.1 Risk of motor neuron disease for ever and cumulative exposure to MP comparing to those never exposed to MP by two assessment approaches.**

| Exposure metrics                |                                         | N                        | Cases  | Cumulative person years | RR      | LCL  | UCL  |      |
|---------------------------------|-----------------------------------------|--------------------------|--------|-------------------------|---------|------|------|------|
| MP exposure                     | Self-reports                            | Never exposed to MP      | 27 278 | 61                      | 530 544 | 1.00 | —    | —    |
|                                 |                                         | Exposed to MP            | 9 548  | 20                      | 158 243 | 0.82 | 0.49 | 1.37 |
|                                 |                                         | Exposed only before 1956 | 853    | 0                       | 8 718   | —    | —    | —    |
|                                 |                                         | Exposed ever after 1956  | 8 695  | 20                      | 149 526 | 0.90 | 0.54 | 1.50 |
|                                 |                                         | Exposed only after 1956  | 6 459  | 16                      | 123 654 | 1.01 | 0.58 | 1.76 |
|                                 | Historical Records                      | Never exposed to MP      | 22 999 | 55                      | 439 363 | 1.00 | —    | —    |
|                                 |                                         | Exposed to MP            | 13 827 | 26                      | 249 425 | 0.80 | 0.50 | 1.28 |
|                                 |                                         | Exposed only before 1956 | 966    | 0                       | 9 573   | —    | —    | —    |
|                                 |                                         | Exposed ever after 1956  | 12 861 | 26                      | 239 852 | 0.88 | 0.55 | 1.40 |
|                                 |                                         | Exposed only after 1956  | 10 187 | 21                      | 207 347 | 0.97 | 0.58 | 1.61 |
| Cumulative MP exposure duration | Self-reports<br>(trend P = 0.760)       | Never exposed to MP      | 27 278 | 61                      | 530 544 | 1.00 | —    | —    |
|                                 |                                         | > 0 – 1 year             | 2 296  | 9                       | 42 089  | 1.62 | 0.81 | 3.27 |
|                                 |                                         | > 1 – 5 years            | 3 833  | <6                      | 68 310  | 0.31 | 0.10 | 1.00 |
|                                 |                                         | > 5 – 10 years           | 1 655  | <6                      | 25 805  | 0.68 | 0.21 | 2.16 |
|                                 |                                         | > 10 years               | 1 764  | <6                      | 22 040  | 1.05 | 0.41 | 2.68 |
|                                 | Historical Records<br>(trend P = 0.695) | Never exposed to MP      | 22 999 | 55                      | 439 363 | 1.00 | —    | —    |
|                                 |                                         | > 0 – 1 year             | 4 507  | 10                      | 92 096  | 1.16 | 0.59 | 2.29 |
|                                 |                                         | > 1 – 5 years            | 4 503  | 6                       | 85 947  | 0.58 | 0.25 | 1.35 |
|                                 |                                         | > 5 – 10 years           | 2 433  | <6                      | 39 617  | 0.45 | 0.14 | 1.44 |
|                                 |                                         | > 10 years               | 2 384  | 7                       | 31 765  | 1.05 | 0.48 | 2.34 |

Motor neuron disease: 1 code (ICD-9: 335.2; ICD-10: G12.2) in any diagnostic field in DAD/NACRS; DAD, Discharge Abstract Database; NACRS, National Ambulatory Care Reporting System. MP: McIntyre powder; Self-reports: self-reported MP exposure; Historical Records: estimated MP exposure; N: total number of miners in the analysis group; RR: Incidence rate ratio; LCL: Lower confidence limit; UCL: Upper confidence limit. The trend P value is calculated by fitting a linear line across median values (as continuous) of cumulative MP exposure duration categories in modelling risk of Alzheimer’s disease and dementia. All models adjusted by age, age<sup>2</sup>, and birth year. Age censored at 100 years old. Reference group: Mining industry workers never exposed to MP.

**S5.3 Risk of motor neuron disease by time since last MP exposure, overall and by ore type, using two assessment approaches.**

| Parameter   | Time since last exposure | Self-reports |         |      |      |      | Historical Records |         |      |      |      |
|-------------|--------------------------|--------------|---------|------|------|------|--------------------|---------|------|------|------|
|             |                          | Cases        | Peryrs  | RR   | LCL  | UCL  | Cases              | Peryrs  | RR   | LCL  | UCL  |
| Full cohort | Never exposed to MP      | 61           | 530 544 | 1.00 | —    | —    | 55                 | 439 363 | 1.00 | —    | —    |
|             | 12–19 years              | < 6          | 21 080  | —    | —    | —    | < 6                | 42 182  | —    | —    | —    |
|             | 20–29 years              | < 6          | 42 894  | —    | —    | —    | 6                  | 74 167  | 0.94 | 0.40 | 2.22 |
|             | 30–39 years              | 9            | 54 134  | 1.07 | 0.53 | 2.17 | 13                 | 83 435  | 1.11 | 0.61 | 2.05 |
|             | 40–49 years              | < 6          | 30 340  | —    | —    | —    | < 6                | 37 362  | —    | —    | —    |
|             | 50–75 years              | < 6          | 9 797   | —    | —    | —    | < 6                | 12 279  | —    | —    | —    |

Motor neuron disease: 1 code (ICD-9: 335.2; ICD-10: G12.2) in any diagnostic field in DAD/NACRS; DAD, Discharge Abstract Database; NACRS, National Ambulatory Care Reporting System. MP: McIntyre powder; Self-reports: self-reported MP exposure; Historical Records: estimated MP exposure; N: total number of miners in the analysis group; Peryrs: cumulative person years; RR: Incidence rate ratio; LCL: Lower confidence limit; UCL: Upper confidence limit. All models adjusted by age, age<sup>2</sup>, and birth year. Age censored at 100 years old. \*Workers in these groups were employed and exposed to MP only in gold and only in uranium mines; Reference group: Mining industry workers with no MP exposure within the same ore type.

**S5.3 Risk for motor neuron disease for ever exposed to MP versus never for various exposure windows.**

| Exposure 'window' | Self-reports |        |              |         |      |      | Historical Records |            |         |              |         |      |      |      |
|-------------------|--------------|--------|--------------|---------|------|------|--------------------|------------|---------|--------------|---------|------|------|------|
|                   | MP Exposed   |        | MP-Unexposed |         | RR   | LCL  | UCL                | MP Exposed |         | MP-Unexposed |         | RR   | LCL  | UCL  |
|                   | cases        | Peryrs | cases        | Peryrs  |      |      |                    | cases      | Peryrs  | cases        | Peryrs  |      |      |      |
| 12–19 years ago   | 2            | 21 080 | 79           | 66 7708 | 1.33 | 0.32 | 5.58               | 2          | 42 182  | 79           | 646 606 | 0.95 | 0.22 | 4.02 |
| 20–29 years ago   | 4            | 57 478 | 77           | 63 1309 | 0.66 | 0.24 | 1.82               | 7          | 95 032  | 74           | 593 756 | 0.89 | 0.40 | 1.98 |
| 30–39 years ago   | 12           | 86 989 | 69           | 60 1799 | 0.95 | 0.51 | 1.76               | 17         | 127 033 | 64           | 561 755 | 1.05 | 0.61 | 1.81 |
| 40–49 years ago   | 9            | 67 409 | 72           | 62 1379 | 0.61 | 0.30 | 1.24               | 13         | 88 264  | 68           | 600 524 | 0.72 | 0.40 | 1.32 |
| 50–75 years ago   | 6            | 26 993 | 75           | 66 1795 | 0.83 | 0.34 | 1.99               | 6          | 38 118  | 75           | 650 670 | 0.56 | 0.24 | 1.34 |

Motor neuron disease: 1 code (ICD-9: 335.2; ICD-10: G12.2) in any diagnostic field in DAD/NACRS; DAD, Discharge Abstract Database; NACRS, National Ambulatory Care Reporting System. MP: McIntyre powder; Self-reports: self-reported MP exposure; Historical Records: estimated MP exposure; N: total number of miners in the analysis group; Peryrs: cumulative person years; RR: Incidence rate ratio; LCL: Lower confidence limit; UCL: Upper confidence limit. All models adjusted by age, age<sup>2</sup>, and birth year. Age censored at 100 years old. Reference group: Mining industry workers with no MP exposure within the same exposure window;

This analysis used a rolling window of exposure and disease follow up. The risk of disease is compared among workers with and without MP exposure in various time windows prior to a given year throughout follow-up. This analysis assumes that those not exposed in each time window as the 'non-exposed'. It also assumes no gaps between first and last exposure dates for all cohort members.
